# Supplementary material
Source: PubMed Central journal article supplement (PMC6588479)
Supplement: NIHMS1527127-supplement-1.pdf [file NIHMS1527127-supplement-1.pdf]

# **Inactivation of nosocomial pathogens on surfaces and in air utilizing Engineered Water Nanostructures (EWNS) based nano-sanitizers**

*Nachiket Vaze Ph.D.<sup>a</sup>, Georgios Pyrgiotakis Ph.D.<sup>a</sup>, James McDevitt Ph.D.<sup>a</sup>, Lucas Mena B.S.<sup>a</sup>, Adler Melo B.S.<sup>a</sup>, Alice Bedugnis B.S.<sup>a</sup>, Lester Kobzik M.D.<sup>a</sup>, Mary Eleftheriadou Ph.D.<sup>b,a</sup>, Philip Demokritou Ph.D.<sup>a\*</sup>*

<sup>a</sup> Center for Nanotechnology and Nanotoxicology, Department of Environmental Health, Harvard T. H. Chan School of Public Health, Harvard University, Boston, MA 02115, USA

<sup>b</sup> School of Sciences, European University Cyprus, 6 Diogenous St., Nicosia 2404, Cyprus

Word count for abstract: 143

Word count for manuscript: 4806

Number of references: 54

Number of figures: 6

Number of tables: 0

Number of Supplementary online-only files, if any: 1

This work was supported by NIH [Grant #1R21AI119481-01]

\* corresponding author: Philip Demokritou (E-mail: [pdemokri@hsph.harvard.edu](mailto:pdemokri@hsph.harvard.edu))

Supplementary Table 1:

| iEWNS        |                    |                 | Operational Parameters |          | Physical Properties |                  |
|--------------|--------------------|-----------------|------------------------|----------|---------------------|------------------|
| Abbreviation | AI                 | AI Conc. [w/v%] | $V$ [kV]               | $h$ [cm] | Diameter [nm]       | Charge [ $e^-$ ] |
| EWNS         | -                  | N/A             | -6.5                   | 4        | 12.1± 0.1           | 13±0             |
| rEWNS        | Electrolyzed water | N/A             | -6.8                   | 4        | 13.2 ± 0.2          | 13±2             |
| h1EWNS       | Hydrogen peroxide  | 1%              | -6.8                   | 4        | 11.9± 0.3           | 11±0             |

**Supplementary Table 1:** Physico-chemical characterization of the iEWNS utilized in the study

Supplementary Figure 1:

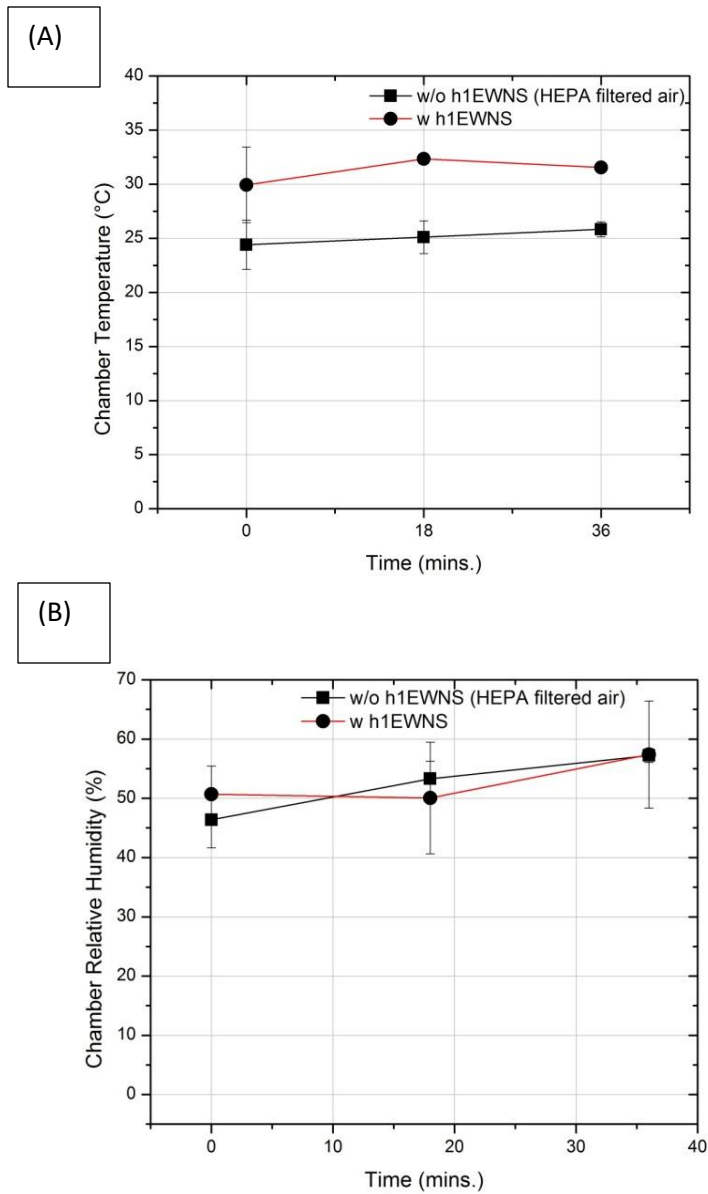

**Figure S1:** Measurement of the chamber temperature (A) and relative humidity (B) during airborne Influenza H1N1/PR/8 inactivation experiments. The control trials (Squares) and h1EWNS treatment trials (Circles) are shown. The results indicate the arithmetic mean of three individual trials. The Standard Deviation (S.D.) denotes the error bars.

Supplementary Figure 2:

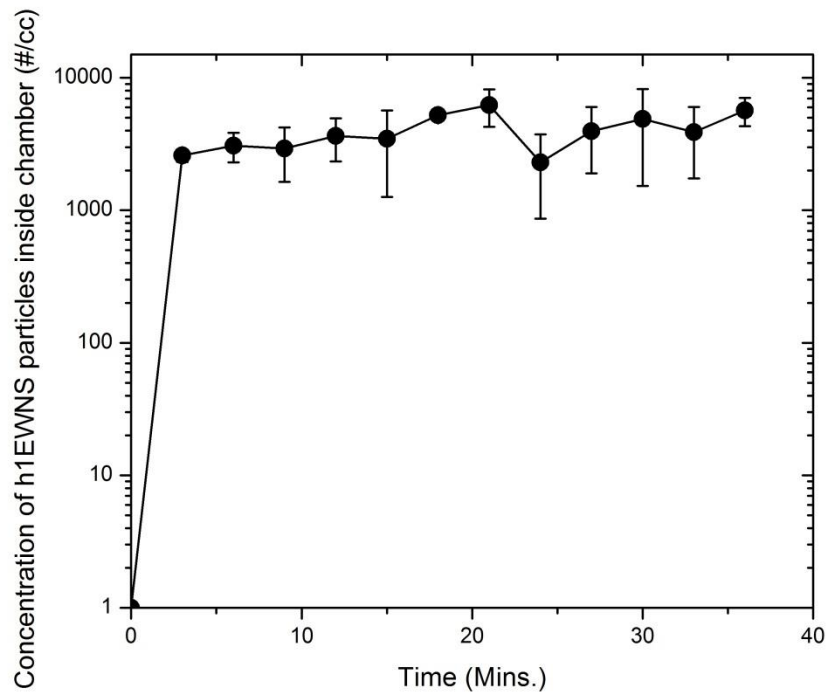

**Figure S2:** The concentration of h1EWNS particles detected inside the environmental chamber. The Scanning Mobility particle Sizer (SMPS) was employed for the measurement. All airflows were maintained identical as the experimental protocol. The viral bioaerosol input was replaced with filtered air. The chamber was operated for 36 minutes and measurement was performed at three minute intervals.
